# Supplementary material
Source: MDPI journal article supplement (https://www.mdpi.com/2076-3417/11/15/6684)
Supplement: s1 [file s1]

## Article

# Evolution of Composting Process in Maize Biomass Revealed by Analytical Pyrolysis (Py-GC/MS) and Pyrolysis Compound Specific Isotope Analysis (Py-CSIA)

Layla M. San-Emeterio <sup>1,2</sup>, Rafael López-Núñez <sup>1</sup>, Francisco J. González-Vila <sup>1</sup> and José A. González-Pérez <sup>1,\*</sup>

<sup>1</sup> Instituto de Recursos Naturales y Agrobiología de Sevilla, (IRNAS-CSIC), Av. Reina Mercedes, 10, 41012 Seville, Spain; lmarsan@irnas.csic.es (L.M.S.-E.); rlnunex@irnase.csic.es (R.L.-N.); fjgon@irnase.csic.es (F.J.G.-V.)

<sup>2</sup> Med\_Soil Research Group, Facultad de Química, Universidad de Sevilla, C/Profesor García González, 1, 41012 Seville, Spain

\* Correspondence: jag@irnase.csic.es; Tel.: +34-954624711; Fax: +34-954624002

**Abstract:** An innovative approach based on the combination of analytical pyrolysis coupled with gas chromatography-mass spectrometry (Py-GC/MS) with compound-specific isotope analysis (Py-CSIA) is used to study the composting process of maize biomass. This multidisciplinary approach aims to elucidate the decomposition rate of the main biogenic materials (lignin, cellulose, proteins, lipids, and waxes) responses to the composting process. According to Py-GC/MS data/structural composition, a noticeable and significant decrease during the first stage of the composting process of carbohydrates and aromatic compounds is found, followed by a gradual increase of all compounds till the end of the experiment. This trend, along with an increase of fatty acids methyl-ester at the first composting stage, sustains the microbial activity and its stabilization over time. Py-CSIA data showed a significant enrichment in <sup>13</sup>C in all identified compounds over time, supporting the semi-quantitative results and the decomposition of initial biomass throughout the composting process. This trend is also perceptible in lignin moieties, long-chain aliphatic structures, and isoprenoids, as highly recalcitrant compounds, presumably due to depolymerization and carbon translocation of side-chain molecules during the composting process. Compound-specific isotope values showed a good correlation with the bulk isotope data, and this served as validation of the technique. However, bulk values showed higher heterogeneity because those represent an average of all organic compounds in the sample. By combining isotopic and structural information using Py-GC/MS and Py-CSIA, we are able to provide further information and a more detailed approach to the study of the decomposition process of biomass by considering the diverse dynamics of the main biogenic compounds.

**Keywords:** compost; lignocellulose characterization; stable carbon isotopes; compound-specific  $\delta^{13}\text{C}$

**Citation:** San-Emeterio, L.M.; López-Núñez, R.; González-Vila, F.J.; González-Pérez, J.A. Evolution of Composting Process in Maize Biomass Revealed by Analytical Pyrolysis (Py-GC/MS) and Pyrolysis Compound Specific Isotope Analysis (Py-CSIA). *Appl. Sci.* **2021**, *11*, 6684. <https://doi.org/10.3390/app11156684>

Academic Editor: Mauro Marini

Received: 25 June 2021

Accepted: 19 July 2021

Published: 21 July 2021

**Publisher's Note:** MDPI stays neutral with regard to jurisdictional claims in published maps and institutional affiliations.

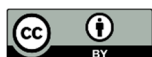

**Copyright:** © 2021 by the authors. Licensee MDPI, Basel, Switzerland. This article is an open access article distributed under the terms and conditions of the Creative Commons Attribution (CC BY) license (<http://creativecommons.org/licenses/by/4.0/>).

**Table S1.** Pyrolysis products and relative abundance<sup>1</sup> of biomass and compost samples taken at different times, yielded by Py-GC/MS.

| RT<br>(min) | T0   | T1   | T2   | T3   | T4    | Compound                                     | MW  | ORIGIN <sup>2</sup> |
|-------------|------|------|------|------|-------|----------------------------------------------|-----|---------------------|
| 2.44        | 0.87 | 1.84 | 2.99 | 0.91 | 1.50  | 1-Penten-3-one                               | 84  | PS                  |
| 2.68        | 0.98 | 0.99 | 0.86 | 1.32 | 1.37  | Pentanal                                     | 86  | PS                  |
| 2.77        | 1.32 | 0.39 | 0.62 | 1.32 | 0.61  | 1-methoxy-1,2-butadiene                      | 84  | PS                  |
| 2.92*       | 2.86 | 2.41 | 2.89 | 2.38 | 3.98  | Furfural                                     | 96  | PS                  |
| 3.04        | 2.07 | 0.67 | 1.17 | 1.68 | 0.96  | 2-Furanmethanol                              | 98  | PS                  |
| 3.56        | 0.00 | 0.00 | 1.70 | 0.00 | 1.88  | 2(5H)-Furanone                               | 84  | PS                  |
| 3.64*       | 5.79 | 1.23 | 2.49 | 2.54 | 3.52  | 1,3-Cyclopentanedione                        | 98  | PS                  |
| 3.96*       | 2.18 | 0.97 | 1.04 | 1.24 | 1.50  | 2-Furancarboxaldehyde, 5-methyl-             | 110 | PS                  |
| 4.10        | 1.62 | 2.00 | 1.85 | 1.30 | 2.33  | Phenol                                       | 94  | ARO                 |
| 4.31*       | 3.34 | 1.87 | 1.99 | 2.87 | 4.70  | 3-Methyl hydantoin                           | 114 | N                   |
| 4.48        | 1.16 | 0.65 | 0.84 | 0.72 | 0.97  | 2-Cyclopenten-1-one, 2-hydroxy-3-methyl-     | 112 | PS                  |
| 4.61*       | 2.06 | 1.40 | 1.57 | 1.58 | 1.32  | 1,2-Cyclopentanedione, 3-methyl- (Isomer?)   | 112 | PS                  |
| 5.08        | 1.11 | 1.92 | 1.97 | 0.97 | 1.82  | Phenol, x-methyl                             | 108 | LH                  |
| 5.28*       | 2.07 | 2.64 | 2.92 | 2.38 | 3.35  | Phenol, 2-methoxy- (Guaiacol)                | 124 | LG                  |
| 5.68*       | 1.43 | 0.54 | 0.82 | 1.57 | 1.30  | 4H-Pyran-4-one, 3-hydroxy-2-methyl- (Maltol) | 126 | PS                  |
| 5.85        | 1.47 | 0.58 | 0.86 | 1.46 | 1.22  | 2H-Pyran-3(4H)-one, dihydro-6-methyl-        | 114 | PS                  |
| 6.13        | 2.44 | 1.23 | 2.32 | 1.19 | 1.69  | Phenol, x-ethyl-                             | 122 | LH                  |
| 6.31        | 0.70 | 0.00 | 0.77 | 1.63 | 0.51  | 2,3-Dihydroxybenzaldehyde                    | 138 | ARO                 |
| 6.49*       | 0.77 | 1.38 | 1.48 | 1.11 | 2.86  | Methylguaiacol                               | 138 | LG                  |
| 6.68        | 2.32 | 0.69 | 0.00 | 0.95 | 1.48  | 4H-Pyran-4-one, 3,5-dihydroxy-2-methyl-      | 142 | PS                  |
| 6.78*       | 6.38 | 6.09 | 7.66 | 9.74 | 13.96 | 4-Vinylphenol                                | 120 | LH                  |
| 6.96*       | 2.62 | 1.16 | 1.46 | 1.63 | 0.83  | 2-Furancarboxaldehyde, 5-(hydroxymethyl)-    | 126 | PS                  |
| 7.42        | 1.23 | 1.80 | 2.45 | 1.43 | 2.55  | 1,2-Benzenediol, 3-methoxy-                  | 140 | ARO                 |
| 7.55*       | 0.85 | 1.41 | 1.43 | 1.35 | 1.68  | Ethylguaiacol                                | 152 | LG                  |

|        |      |      |      |      |      |                                                   |     |     |
|--------|------|------|------|------|------|---------------------------------------------------|-----|-----|
| 7.78   | 0.00 | 1.57 | 1.18 | 0.00 | 0.00 | Indole                                            | 117 | N   |
| 7.87   | 1.73 | 0.00 | 0.00 | 1.23 | 1.06 | 1,2-Benzenediol, 4-methyl-                        | 124 | ARO |
| 8.01*  | 5.31 | 3.66 | 4.33 | 5.56 | 6.39 | 4-Vinylguaiacol                                   | 150 | LG  |
| 8.44*  | 1.37 | 2.52 | 2.88 | 2.11 | 3.61 | Syringol                                          | 154 | LS  |
| 8.53   | 0.52 | 0.63 | 0.46 | 0.83 | 0.62 | Eugenol                                           | 164 | LG  |
| 8.63   | 0.92 | 0.76 | 0.93 | 0.77 | 0.65 | Isomer                                            | 154 | LS  |
| 8.95   | 1.25 | 0.79 | 0.91 | 0.91 | 0.73 | 1H-Indole, 2-methyl-                              | 131 | N   |
| 9.10*  | 1.43 | 1.15 | 1.89 | 2.10 | 1.46 | Vanillin                                          | 152 | LG  |
| 9.16   | 0.00 | 0.64 | 0.00 | 0.00 | 0.00 | Isomer eugenol (trans-Isoeugenol)                 | 164 | LG  |
| 9.61*  | 0.74 | 0.97 | 1.09 | 0.84 | 0.77 | Methylsyringol                                    | 168 | LS  |
| 9.68*  | 1.15 | 1.57 | 1.09 | 1.64 | 1.03 | Isoeugenol                                        | 164 | LG  |
| 10.16* | 1.17 | 1.62 | 2.52 | 1.03 | 1.36 | Acetoguaiacone                                    | 166 | LG  |
| 10.50* | 0.22 | 1.30 | 0.00 | 0.41 | 0.54 | 1,6-Anhydro-.beta.-D-glucopyranose (levoglucosan) | 162 | PS  |
| 10.52  | 0.50 | 0.00 | 0.54 | 0.37 | 0.70 | Vanillic acid, methyl ester                       | 182 | LG  |
| 10.58  | 0.49 | 1.47 | 0.88 | 0.50 | 0.80 | Ethylsyringol                                     | 182 | LS  |
| 10.65  | 0.56 | 0.00 | 0.00 | 0.52 | 0.00 | Lignin unknown compound #89*                      | 164 | LG  |
| 10.71  | 0.83 | 1.52 | 1.36 | 0.75 | 1.10 | Guaiacylacetone                                   | 180 | LG  |
| 10.91  | 1.67 | 0.99 | 1.30 | 1.09 | 0.99 | Dodecanoic acid (FA12)                            | 200 | FA  |
| 11.04* | 1.80 | 2.13 | 2.56 | 2.34 | 2.34 | Vinylsyringol                                     | 180 | LS  |
| 11.46* | 0.68 | 0.84 | 0.96 | 0.70 | 0.51 | Propenylsyringol (PS)                             | 194 | LS  |
| 11.89  | 0.85 | 0.69 | 0.00 | 0.52 | 0.42 | Hexadecane, 2,6,10,14-tetramethyl-                | 282 | ISO |
| 12.03  | 0.68 | 0.79 | 1.09 | 0.91 | 0.43 | Isomer of PS                                      | 194 | LS  |
| 12.17  | 0.97 | 0.93 | 1.32 | 0.96 | 0.81 | Syringaldehyde                                    | 182 | LS  |
| 12.39  | 0.92 | 0.84 | 1.09 | 0.79 | 0.64 | Propynylsyringol (PS2)                            | 192 | LS  |
| 12.47  | 0.00 | 0.67 | 0.80 | 0.50 | 0.37 | Isomer of (PS2)                                   | 192 | LS  |
| 12.58* | 1.02 | 1.76 | 2.26 | 1.86 | 2.03 | Isomer of PS                                      | 194 | LS  |
| 12.80* | 1.64 | 1.36 | 1.25 | 0.82 | 0.79 | cis-2-Methyl-7-octadecene                         | 266 | ISO |
| 12.98* | 1.03 | 1.35 | 1.65 | 0.82 | 1.25 | Acetosyringone                                    | 196 | LS  |

|        |      |      |      |      |      |                                                                |     |      |
|--------|------|------|------|------|------|----------------------------------------------------------------|-----|------|
| 13.12* | 2.10 | 0.92 | 1.19 | 1.37 | 0.71 | Tetradecanoic acid (FA14)                                      | 228 | FA   |
| 13.35* | 0.91 | 1.03 | 1.31 | 0.94 | 1.04 | Syringylacetone                                                | 210 | LS   |
| 13.95* | 0.62 | 0.65 | 0.59 | 0.45 | 0.55 | Neophytadiene                                                  | 278 | ISO  |
| 14.02* | 0.77 | 0.57 | 0.53 | 0.37 | 0.26 | 2-Pentadecanone, 6,10,14-trimethyl-                            | 268 | ISO  |
| 14.08  | 0.57 | 0.59 | 0.65 | 0.43 | 0.18 | 2-Propenoic acid, 3-(4-hydroxy-3-methoxyphenyl)-, methyl ester | 208 | LG   |
| 14.39  | 0.68 | 0.54 | 0.46 | 0.37 | 0.12 | Bicyclo[10.8.0]eicosane, (E)-                                  | 278 | LIP  |
| 14.81  | 0.51 | 0.77 | 0.79 | 0.25 | 0.12 | Hexadecanoic acid, methyl ester                                | 270 | FAME |
| 15.18* | 3.66 | 2.37 | 2.14 | 1.84 | 1.84 | n-Hexadecanoic acid (FA16)                                     | 256 | FA   |
| 16.50  | 0.44 | 0.65 | 0.26 | 0.20 | 0.14 | Alk/Alk C21                                                    | 296 | Alk  |
| 16.72  | 0.47 | 0.77 | 0.00 | 0.31 | 0.06 | Phytol/methyl stearate (sólo nov18)                            | 296 | ISO  |
| 16.86* | 3.23 | 2.33 | 2.27 | 1.64 | 1.40 | Octadecadienoic + Octadecenoic acid (FA18:2 FA18:1)            | 280 | FA   |
| 17.04* | 1.60 | 1.06 | 1.30 | 0.81 | 0.55 | Octadecanoic acid (FA18)                                       | 284 | FA   |
| 17.36  | 0.43 | 0.64 | 0.65 | 0.34 | 0.12 | Alk/Alk C22                                                    | 310 | Alk  |
| 18.23* | 0.64 | 0.47 | 0.38 | 0.32 | 0.16 | Alk/Alk C23                                                    | 324 | Alk  |
| 18.62  | 0.51 | 0.81 | 0.63 | 0.59 | 0.42 | Unknown (m/z 83, 280)                                          | 280 | UNK  |
| 18.77* | 0.56 | 0.40 | 0.37 | 0.75 | 0.13 | 4,8,12,16-Tetramethylheptadecan-4-olide                        | 324 | TOC  |
| 19.05  | 0.34 | 0.37 | 0.34 | 0.29 | 0.10 | Alk/Alk C24                                                    | 338 | Alk  |
| 19.84* | 0.31 | 0.40 | 0.32 | 0.34 | 0.16 | Alk/Alk C25                                                    | 352 | Alk  |
| 20.09  | 0.25 | 0.32 | 0.32 | 0.44 | 0.07 | Docosanoic acid, methyl ester                                  | 354 | FAME |
| 20.28  | 0.31 | 0.50 | 0.24 | 0.18 | 0.10 | Unknown (m/z 93, 346)                                          | 346 | UNK  |
| 20.38  | 0.36 | 0.82 | 0.40 | 0.55 | 0.11 | Docosanoic acid (FA22)                                         | 340 | FA   |
| 20.61  | 0.43 | 0.54 | 0.26 | 0.27 | 0.13 | Alk/Alk C26                                                    | 366 | Alk  |
| 21.15  | 0.16 | 0.93 | 0.36 | 0.51 | 0.03 | Tricosanoic acid (FA23)                                        | 354 | FA   |
| 21.35* | 0.45 | 0.78 | 0.41 | 0.62 | 0.26 | Alk/Alk C27                                                    | 380 | Alk  |
| 21.58  | 0.17 | 0.89 | 0.44 | 0.41 | 0.09 | Tetracosanoic acid, methyl ester                               | 382 | FAME |
| 21.88  | 0.21 | 0.75 | 0.39 | 0.52 | 0.10 | Tetracosanoic acid (FA24)                                      | 368 | FA   |
| 22.05  | 0.33 | 1.08 | 0.72 | 0.63 | 0.18 | Alk/Alk C28                                                    | 394 | Alk  |
| 22.75* | 0.27 | 0.69 | 0.31 | 0.45 | 0.23 | Alk/Alk C29                                                    | 408 | Alk  |

|        |      |      |      |      |      |                                           |     |     |
|--------|------|------|------|------|------|-------------------------------------------|-----|-----|
| 23.50  | 0.14 | 0.61 | 0.27 | 0.36 | 0.20 | Alk/Alk C30                               | 422 | Alk |
| 24.04  | 0.10 | 0.00 | 0.00 | 0.00 | 0.00 | Stigmasta-4,7,22-trien-3.beta.-ol         | 410 | EST |
| 24.15* | 0.14 | 0.75 | 0.30 | 0.79 | 0.09 | .gamma.-Tocopherol                        | 416 | TOC |
| 24.35* | 0.21 | 0.75 | 0.30 | 0.54 | 0.24 | Alk/Alk C31                               | 436 | Alk |
| 24.43  | 0.17 | 0.52 | 0.21 | 0.33 | 0.16 | Ergosta-4,6,22-trien-3.beta.-ol           | 396 | EST |
| 24.57* | 0.31 | 0.77 | 0.24 | 0.70 | 0.00 | Unknown (m/z 379, 394)                    | 394 | UNK |
| 24.77* | 0.32 | 1.08 | 0.23 | 0.97 | 0.12 | Stigmasta-3,5-diene                       | 396 | EST |
| 24.92* | 0.16 | 1.32 | 0.41 | 1.04 | 0.09 | dl.-alpha.-Tocopherol                     | 430 | TOC |
| 26.17  | 0.01 | 0.84 | 0.26 | 0.82 | 0.11 | 5-Cholestene-3-ol, 24-methyl-             | 400 | EST |
| 26.46  | 0.02 | 0.41 | 0.10 | 0.35 | 0.07 | Alk/Alk C33                               | 436 | Alk |
| 26.55  | 0.01 | 0.60 | 0.18 | 0.52 | 0.10 | Stigmasterol                              | 412 | EST |
| 26.80  | 0.01 | 0.45 | 0.00 | 0.45 | 0.00 | Ursa-9(11),12-dien-3-ol                   | 424 | EST |
| 27.30  | 0.04 | 2.02 | 0.62 | 1.48 | 0.10 | .gamma.-Sitosterol                        | 414 | EST |
| 27.46  | 0.00 | 0.00 | 0.00 | 0.25 | 0.00 | Stigmastanol                              | 416 | EST |
| 27.93  | 0.01 | 0.34 | 0.05 | 0.31 | 0.00 | .beta.-Amyrin                             | 426 | EST |
| 28.71  | 0.01 | 0.32 | 0.15 | 0.39 | 0.00 | Stigmasta-3,5-dien-7-one (Tremulone)      | 410 | EST |
| 29.36  | 0.00 | 0.21 | 0.11 | 0.37 | 0.07 | Stigmast-4-en-3-one (.gamma.-Sitostenone) | 412 | EST |

<sup>1</sup>Calculated as percentage of total ion chromatographic area. Average values of pyrochromatograms according to their compound families indicated in Table 1.

<sup>2</sup>PS: polysaccharides, LH: hydroxyphenyl-units from lignin, LG: guaiacyl-units from lignin, LS: syringyl-units from lignin, N: nitrogen-derived compounds, ARO: aromatics, UNK: unknown compounds, LIP: mid-chain lipids, FA: fatty acids, FAME: fatty acid-methyl ester, ISO: isoprenoids, ALK: *n*-alkanes, EST: sterols.

**Table S2.** Compound specific  $\delta^{13}\text{C}$  (‰) average values of compost pyrolysis products at different sampling time. Values are reported in ‰ [V-PDB]. Mean standard deviation is shown in brackets (n=3).

| Origin <sup>1</sup> | T1                         | T2                         | T3                         | T4                         |
|---------------------|----------------------------|----------------------------|----------------------------|----------------------------|
| PS                  | -16.1 (1.0) <sup>a *</sup> | -11.5 (1.2) <sup>a</sup>   | -11.3 (1.6) <sup>a</sup>   | -9.8 (1.3) <sup>a</sup>    |
| N                   | -14.6 (0.73) <sup>a</sup>  | -10.6 (0.55) <sup>a</sup>  | -8.9 (1.3) <sup>ab</sup>   | -8.0 (0.21) <sup>ab</sup>  |
| LH                  | -18.9 (0.05) <sup>ab</sup> | -13.9 (0.87) <sup>ab</sup> | -13.9 (0.80) <sup>ab</sup> | -12.7 (0.57) <sup>ab</sup> |
| LG                  | -18.4 (1.1) <sup>a</sup>   | -13.3 (0.80) <sup>ab</sup> | -12.4 (1.2) <sup>a</sup>   | -12.5 (1.1) <sup>ab</sup>  |
| LS                  | -18.6 (1.0) <sup>ab</sup>  | -14.2 (0.45) <sup>b</sup>  | -13.5 (0.50) <sup>a</sup>  | -13.5 (0.55) <sup>ab</sup> |
| FA                  | -19.2 (0.93) <sup>ab</sup> | -16.0 (3.8) <sup>b</sup>   | -15.0 (1.7) <sup>b</sup>   | -14.0 (0.52) <sup>bc</sup> |
| ISO                 | -17.5 (2.0) <sup>ab</sup>  | -14.7 (0.20) <sup>b</sup>  | -14.0 (0.2) <sup>ab</sup>  | -14.0 (0.29) <sup>bc</sup> |
| ALK                 | -25.7 (3.7) <sup>b</sup>   | -25.6 (3.1) <sup>b</sup>   | -22.8 (2.4) <sup>b</sup>   | -21.4 (4.2) <sup>c</sup>   |
| TOC                 | -19.1 (4.1) <sup>ab</sup>  | -19.22 (11.1) <sup>b</sup> | -19.3 (7.8) <sup>bc</sup>  | -15.2 (2.6) <sup>bc</sup>  |
| UNK                 | -23.5 (4.4) <sup>ab</sup>  | -15.01 (1.5) <sup>b</sup>  | -13.8 (0.85) <sup>ab</sup> | -18.3 (2.2) <sup>bc</sup>  |
| EST                 | -24.2 (1.0) <sup>ab</sup>  | -23.79 (1.3) <sup>b</sup>  | -16.3 (1.2) <sup>ab</sup>  | -15.5 (1.2) <sup>ab</sup>  |

<sup>1</sup>PS: polysaccharides, N: nitrogen-derived compounds, LH: lignin hydroxyphenyl-units, LG: lignin guaiacyl-units, LS: lignin syringyl-units, FA: fatty acids, ISO: isoprenoids, ALK: *n*-alkanes, TOC: tocopherols, UNK: unknown compounds, EST: sterols. Treatments with the same letters indicate no significant differences (Kruskal-Wallis test,  $p < 0.05$ , Dunn post-hoc) among compound families within the same sampling time.
